# Supplementary material for: Genetic and Pharmacological Targeting of Transcriptional Repression in Resistance to Thyroid Hormone Alpha
Source: PubMed Central journal article supplement (PMC6533791; doi:10.1089/thy.2018.0399), 2019-05-13
Supplement: Supp_Fig1.pdf [file Supp_Fig1.pdf]

## Supplementary Data

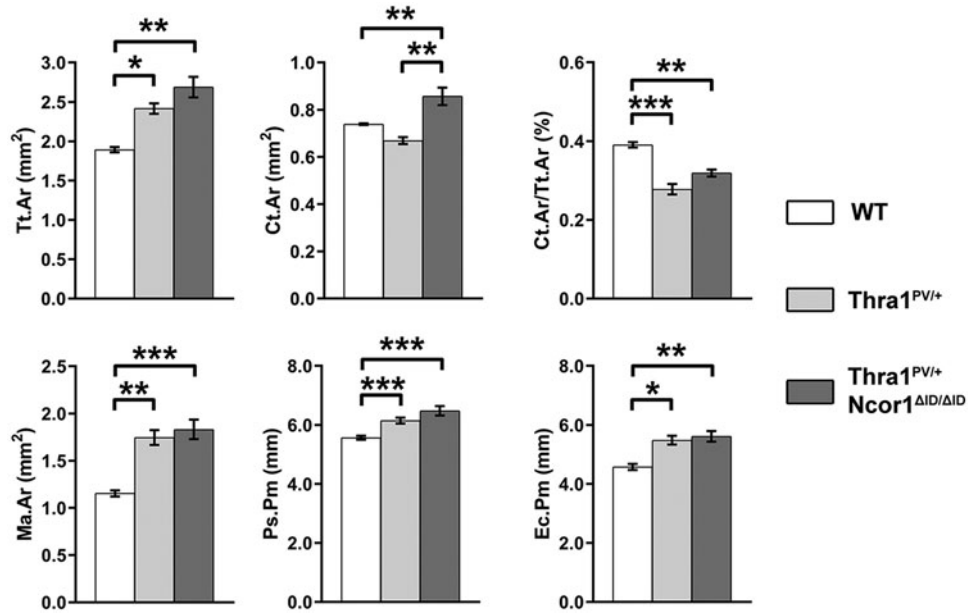

**SUPPLEMENTARY FIG. S1.** Disruption of the interaction between NcoR1 and TR $\alpha$  ameliorates the skeletal phenotype in *Thra1<sup>PV/+</sup>* mice—additional cortical micro-CT analyses. Graphs showing total cross-sectional area inside the periosteal envelope (Tt.Ar), cortical bone area (Ct.Ar), cortical area fraction (Ct.Ar/Tt.Ar), medullary (or marrow) area (Ma.Ar), periosteal perimeter (Ps.Pm), and endocortical perimeter (Ec.Pm) from male wild-type (WT), *Thra1<sup>PV/+</sup>*, and *Thra1<sup>PV/+</sup>NCoR1<sup>ΔID/ΔID</sup>* mice at 14 weeks of age ( $n=3$  per genotype). Data are shown as the mean  $\pm$  standard error of the mean (SEM). \* $p < 0.05$ , \*\* $p < 0.01$ , and \*\*\* $p < 0.001$ ; ANOVA followed by Tukey's *post hoc* test.
