# Supplementary material for: Genetic and Pharmacological Targeting of Transcriptional Repression in Resistance to Thyroid Hormone Alpha
Source: PubMed Central journal article supplement (PMC6533791; doi:10.1089/thy.2018.0399), 2019-05-13
Supplement: Supp_Fig2.pdf [file Supp_Fig2.pdf]

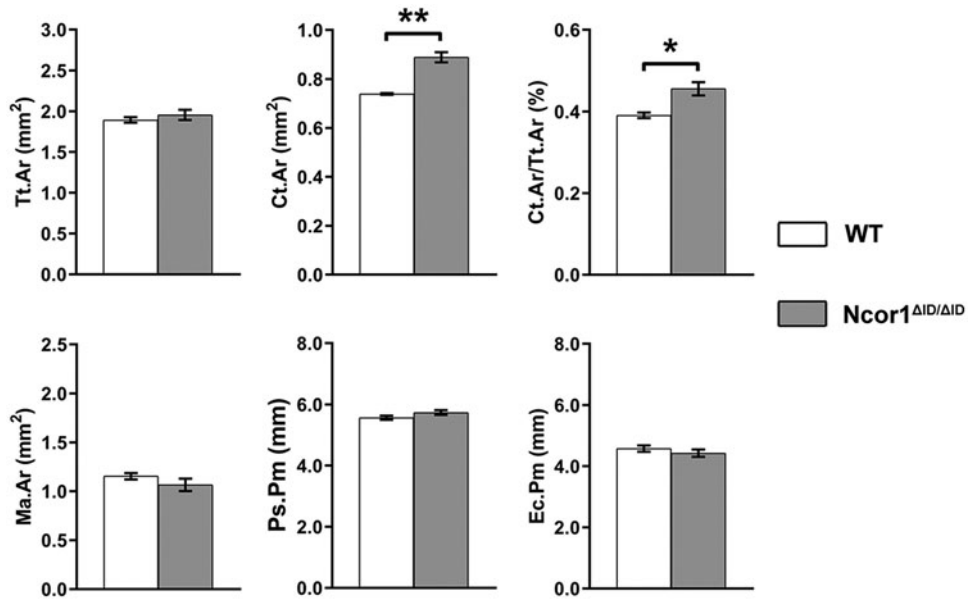

**SUPPLEMENTARY FIG. S2.** Disruption of the interaction between NcoR1 and TR $\alpha$  increases bone mass, mineralization, and strength in WT mice—additional cortical micro-CT analyses. Graphs showing Tt.Ar, Ct.Ar, Ct.Ar/Tt.Ar, Ma.Ar, Ps.Pm, and Ec.Pm from male WT and *NCoR1*<sup>ΔID/ΔID</sup> mice at 14 weeks of age ( $n=3$  per genotype). Data are shown as the mean  $\pm$  SEM. \* $p < 0.05$  and \*\* $p < 0.01$ ; Student's  $t$ -test.
