# Supplementary material for: Genetic and Pharmacological Targeting of Transcriptional Repression in Resistance to Thyroid Hormone Alpha
Source: PubMed Central journal article supplement (PMC6533791; doi:10.1089/thy.2018.0399), 2019-05-13
Supplement: Supp_Fig4.pdf [file Supp_Fig4.pdf]

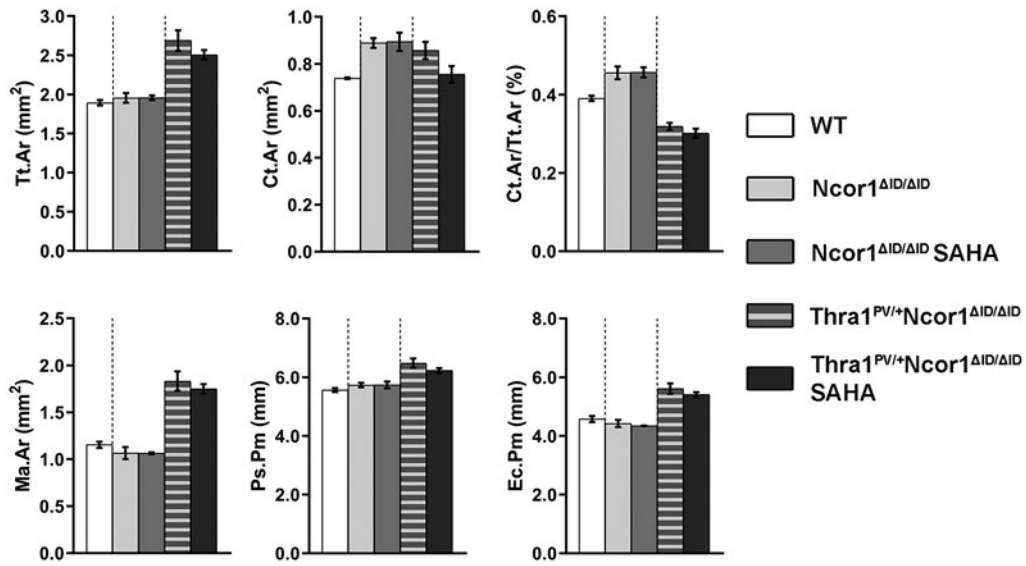

**SUPPLEMENTARY FIG. S4.** Treatment with SAHA has no effect on bone mass, mineralization, or strength in *NCoR1*<sup>ΔID/ΔID</sup> or *Thra1*<sup>PV/+</sup>*NCoR1*<sup>ΔID/ΔID</sup> mice—additional cortical micro-CT analyses. Graphs showing Tt.Ar, Ct.Ar, Ct.Ar/Tt.Ar, Ma.Ar, Ps.Pm, and Ec.Pm from male WT, *NCoR1*<sup>ΔID/ΔID</sup>, SAHA-treated *NCoR1*<sup>ΔID/ΔID</sup> (*NCoR1*<sup>ΔID/ΔID</sup> SAHA), *Thra1*<sup>PV/+</sup>*NCoR1*<sup>ΔID/ΔID</sup>, and SAHA-treated *Thra1*<sup>PV/+</sup>*NCoR1*<sup>ΔID/ΔID</sup> (*Thra1*<sup>PV/+</sup>*NCoR1*<sup>ΔID/ΔID</sup> SAHA) mice at 14 weeks of age ( $n=3$  per genotype). Data are shown as the mean  $\pm$  SEM.
